# Supplementary material
Source: Research Square preprint supplement (doi:10.21203/rs.3.rs-9305049/v1)
Supplement: Supplementary file 1 [file c78732d2c2a3049c35c72294.pdf]

## Supplementary Materials

### Helminth infection is linked to an impaired neutralisation response to SARS-CoV-2 post vaccination

Authors:

\*Mhairi J. McCormack BSc (Hons)<sup>1</sup>, [m.mccormack.1@research.gla.ac.uk](mailto:m.mccormack.1@research.gla.ac.uk)

Louis Banda MSc<sup>2</sup>, [louis.banda@meiru.mw](mailto:louis.banda@meiru.mw)

Stephen Kasenda MBBS<sup>2</sup>, [stephen.kasenda@meiru.mw](mailto:stephen.kasenda@meiru.mw)

Lyson Samikwa BSc (Hons)<sup>3</sup>, [lsamikwa@kuhes.ac.mw](mailto:lsamikwa@kuhes.ac.mw)

Harry Meleke BSc (Hons)<sup>3</sup>, [hmeleke@kuhes.ac.mw](mailto:hmeleke@kuhes.ac.mw)

Ellen C. Hughes PhD<sup>1,4</sup>, [ellen.hughes@ed.ac.uk](mailto:ellen.hughes@ed.ac.uk)

Amelia Crampin MSc<sup>2,5</sup>, [mia.crampin@lshtm.ac.uk](mailto:mia.crampin@lshtm.ac.uk)

David Chaima PhD<sup>3</sup>, [dchaima@kuhes.ac.mw](mailto:dchaima@kuhes.ac.mw)

Tonney Nyirenda PhD<sup>3</sup>, [tnyirenda@kuhes.ac.mw](mailto:tnyirenda@kuhes.ac.mw)

Brian J Willett PhD<sup>1†</sup>, [Brain.Willett@glasgow.ac.uk](mailto:Brain.Willett@glasgow.ac.uk)

Abena S. Amoah PhD<sup>2,6,7†</sup>, [a.s.amoah@lumc.nl](mailto:a.s.amoah@lumc.nl)

Antonia Ho PhD<sup>1†</sup>, [Antonia.Ho@glasgow.ac.uk](mailto:Antonia.Ho@glasgow.ac.uk)

\*Corresponding author

†These authors contributed equally to this work

Affiliations:

1. Medical Research Council-University of Glasgow Centre for Virus Research, Glasgow, UK
2. Malawi Epidemiology and Intervention Research Unit (MEIRU), Malawi
3. Kamuzu University of Health Sciences (KUHeS), Blantyre, Malawi
4. The Roslin Institute and R(D)SVS, University of Edinburgh, Edinburgh, UK
5. School of Health and Wellbeing, University of Glasgow, Glasgow, UK
6. Department of Population Health, Faculty of Epidemiology and Population Health, London School of Hygiene and Tropical Medicine
7. Leiden University Center for Infectious Diseases, Leiden University Medical Center, Leiden, Netherlands

## Table of Contents

|                                                                                                                                                                                                                                                                                                                                            |           |
|--------------------------------------------------------------------------------------------------------------------------------------------------------------------------------------------------------------------------------------------------------------------------------------------------------------------------------------------|-----------|
| <b>Supplementary Methods</b> .....                                                                                                                                                                                                                                                                                                         | <b>3</b>  |
| Baseline demographic details .....                                                                                                                                                                                                                                                                                                         | 3         |
| Cells.....                                                                                                                                                                                                                                                                                                                                 | 3         |
| Generation of HIV(SARS-CoV-2) pseudotypes.....                                                                                                                                                                                                                                                                                             | 3         |
| Pseudotyped virus neutralisation assay protocol.....                                                                                                                                                                                                                                                                                       | 4         |
| Nucleocapsid ELISA protocol.....                                                                                                                                                                                                                                                                                                           | 4         |
| Spike ELISA protocol.....                                                                                                                                                                                                                                                                                                                  | 4         |
| Helminth detection protocol.....                                                                                                                                                                                                                                                                                                           | 5         |
| Statistical analyses .....                                                                                                                                                                                                                                                                                                                 | 6         |
| Generalised additive model (GAM).....                                                                                                                                                                                                                                                                                                      | 6         |
| <b>Supplementary Tables</b> .....                                                                                                                                                                                                                                                                                                          | <b>9</b>  |
| Supplementary Table 1. Spike gene construct mutations, relative to the Wuhan-Hu-1 sequence (GenBank: MN908947). .....                                                                                                                                                                                                                      | 9         |
| Supplementary Table 2. Primers and probes for Schistosoma spp. helminth PCR.....                                                                                                                                                                                                                                                           | 9         |
| Supplementary Table 3. Participant Characteristics.....                                                                                                                                                                                                                                                                                    | 10        |
| Supplementary Table 4. Cross tabulation of Schistosoma spp. infection with prevalence of contact with water. ....                                                                                                                                                                                                                          | 10        |
| Supplementary Table 5. Relationship between nAb titre, helminth status, and vaccination status – all SARS-CoV-2 nAb positives. ....                                                                                                                                                                                                        | 11        |
| Supplementary Table 6. Relationship between nAb titre and age (by vaccine status) – all SARS-CoV-2 nAb positives. ....                                                                                                                                                                                                                     | 11        |
| Supplementary Table 7. Relationship between nAb titre and titre variant, and helminth status – vaccinated individuals. ....                                                                                                                                                                                                                | 12        |
| Supplementary Table 8. Relationship between nAb titre vs age and titre vs time since COVID-19 vaccination–vaccinated individuals. ....                                                                                                                                                                                                     | 12        |
| <b>Supplementary Figures</b> .....                                                                                                                                                                                                                                                                                                         | <b>13</b> |
| Supplementary Figure 1. Map of Malawi, showing the location of the Karonga Health Demographic Surveillance Site and Area 25, Lilongwe.....                                                                                                                                                                                                 | 13        |
| Supplementary Figure 2. Helminth prevalence (%) by age group (years) of the participants. Helminth prevalence includes individuals tested positive for ‘any helminth infection’. ....                                                                                                                                                      | 14        |
| Supplementary Figure 3. Helminth prevalence (%) by biological sex of the participants. Helminth prevalence includes individuals tested positive for ‘any helminth infection’. ....                                                                                                                                                         | 15        |
| Supplementary Figure 4: Neutralisation of different SARS-CoV-2 viruses in helminth infected individuals, stratified by helminth type - soil transmitted helminth (STH) (A. duodenale and N. americanus) vs Schistosoma spp. (in stool and urine). 22 participants included – n=13 with STH infection; n=9 with Schistosoma infection. .... | 16        |
| Supplementary Figure 5. Relationship between helminth burden (inferred by PCR cycle threshold (Ct) values) and SARS-CoV-2 neutralising antibody (nAb) titre using 50% threshold. ....                                                                                                                                                      | 17        |
| Supplementary Figure 6: Relationship between age(years) and nAb titre - all SARS-CoV-2 nAb positives. ....                                                                                                                                                                                                                                 | 18        |

|                                                                                                                                                                        |           |
|------------------------------------------------------------------------------------------------------------------------------------------------------------------------|-----------|
| Supplementary Figure 7: Relationship between nAb titre time since last vaccination (days) – vaccinated individuals.....                                                | 19        |
| Supplementary Figure 8: Anti-SARS-CoV-2 Spike IgG (Absorbance) by helminth status, among those Spike (S) ELISA positive, separated by SARS-CoV-2 exposure history..... | 20        |
| <b>References.....</b>                                                                                                                                                 | <b>21</b> |

## Supplementary Methods

### Baseline demographic details

Baseline demographic details collected included: socioeconomic indicators; medical history; COVID-19 symptoms; COVID-19 vaccination history; and infection preventative behaviours. Nutritional status information (BMI, waist, hip and arm circumference) was not analysed as it was only collected for 178 (73.6%) of the participants from Karonga, and was not collected for participants from Lilongwe. A questionnaire on helminth treatment, potential helminth infection symptoms, and water contact history was completed.

### Cells

Cells were maintained at 37°C, 5% CO<sub>2</sub>. HEK293-ACE2 cells (produced by stable transfection of HEK293 cells with pSCRPSY-hACE2) were kindly provided by Matt Turnbull and Suzannah Rihn, MRC-University of Glasgow Centre for Virus Research. These cells were maintained in Dulbecco's modified Eagle's medium (DMEM) with 10% foetal bovine serum, 2 mM L-glutamine, 100 µg/ml streptomycin, and 100 IU/ml penicillin added (complete DMEM), supplemented with 2 µg/ml puromycin. HEK293T cells (produced by stable transfection of HEK293 cells with a plasmid encoding the simian vacuolating virus 40 (SV40) large T antigen) were obtained from the American Type Culture Collection (ATCC) via University College London. These cells were maintained in complete DMEM supplemented with 400 µg/ml G418.

### Generation of HIV(SARS-CoV-2) pseudotypes

To generate HIV-based SARS-CoV-2 pseudotypes (HIV(SARS-CoV-2)), HEK293T cells were transfected with three different plasmids using polyethylenimine (PEI; 1 µL/mL, Polysciences, Warrington, USA): 0.15 µg/mL of a codon-optimized SARS-CoV-2 spike gene expression vector representing one of six variants—Ancestral B.1 (D614G), Alpha (B.1.1.7), Beta (B.1.351), Delta (B.1.617.2), Omicron BA.1 (B.1.1.529), or Omicron BA.2—synthesized by GenScript Biotech (Supplementary Table 1); 0.1 µg/mL of p8.91, a plasmid encoding HIV-1 gag-pol (Addgene) [1]; 0.1 µg/mL of pCSFLW, encoding firefly luciferase [2]. The DNA:PEI complexes were incubated at room temperature for 20 minutes before being added to HEK293T cells. After 48 hours of incubation at 37 °C, culture supernatants containing HIV(SARS-CoV-2) pseudotypes were collected, filtered through 0.45 µm filters, aliquoted, and stored at -80 °C.

## **Pseudotyped virus neutralisation assay protocol**

All serum samples were tested in a single dilution screen for neutralising activity against the Ancestral B.1, Beta, Delta, and Omicron BA.1 spikes (Supplementary Table 1). Sera were diluted 1 in 25 in complete DMEM and incubated in duplicate for one hour with a specific pseudovirus at 37 °C (final serum dilution 1 in 50). HEK293-ACE2 target cells were added and after incubation for 48-72 hours at 37°C, luciferase activity was measured by adding 75µL of Steadylite Plus chemiluminescence substrate to each well (diluted 1 in 3 in distilled water) (Revvity, Waltham, MA, USA) and luminescence was measured using a Revvity EnSight multimode plate reader (Revvity, Waltham, MA, USA). Samples with percent neutralisation >90% were considered positive.

Positive samples were titrated against Ancestral B.1, Beta, Delta, Omicron BA.1 and Omicron BA.2 (the variants thought to have been transmitted in Malawi prior to sample collection [3]). Titration was performed by serial dilution of the samples in complete DMEM before a one hour incubation in triplicate with the pseudovirus at 37°C. HEK293-ACE2 target cells were added and after 48-72 hours, Steadylite Plus chemiluminescence substrate was added and luciferase activity was measured on the EnSight multimode plate reader. Titres were calculated at 50% reduction in infectivity, allowing observation of weaker nAb responses.

## **Nucleocapsid ELISA protocol**

Immulon 2HB 96-well plates (ThermoFisher Scientific, UK) were coated overnight at 4 °C with 50 µL per well of nucleocapsid (N) protein (1.0 µg/mL in phosphate-buffered saline [PBS]). Plates were washed using a Wellwash Versa plate washer (ThermoFisher Scientific, UK) with PBS containing 0.05% Tween-20 (PBST), then blocked for 1 hour at room temperature with PBST containing 10% casein (Vector Laboratories via 2BScientific, UK). Test and control sera were diluted 1 in 100 in blocking buffer and added in duplicate (50 µL per well), followed by a 1-hour incubation. After washing, 50 µL of horseradish peroxidase (HRP)-conjugated anti-human IgG (Bethyl Laboratories via Cambridge Bioscience, UK) diluted 1 in 3000 was added to each well and incubated for 1 hour. Plates were washed again before addition of 50 µL of 3,3',5,5'-tetramethylbenzidine (TMB) substrate (KPL, USA) for 10 minutes in the dark. The reaction was stopped with 50 µL of 1 M sulfuric acid, and absorbance was measured at 450 nm using a Multiskan FC plate reader (ThermoFisher Scientific, UK). Raw absorbance values were normalised using the following equation:

$$\text{Normalised absorbance} = \frac{\text{sample absorbance} - \text{negative control mean}}{\text{negative control mean}}$$

Samples with a normalised absorbance  $\geq 3.666$  were considered positive.

## **Spike ELISA protocol**

IgG responses to the SARS-CoV-2 spike protein were measured using a SARS-CoV-2 S1 ELISA carried out by the MEIRU laboratory, following previously described methods [3,4]. In brief, Immulon 2HB 96-well plates (ThermoFisher Scientific, UK) were coated with 50 µL of recombinant SARS-CoV-2 S1 antigen ([www.nibsc.org](http://www.nibsc.org)) at 1 µg/mL in PBS. The assay

procedure followed the same steps as the N ELISA. Absorbance was read immediately at 450 nm using an Accuris SmartReader 96 microplate reader (Benchmark Scientific, Edison, NJ, USA), and samples with a normalised absorbance of  $\geq 1.620$  were considered positive. Each plate included a single positive serum control and five negative serum controls obtained from MEIRU FIND study samples collected in January 2019 (NHSRC protocol #16/09/1668).

### Helminth detection protocol

For urine samples:

Urine samples were tested for *Schistosoma spp.* infection. Genomic DNA was extracted from 200  $\mu\text{L}$  of urine using the FastDNA™ Spin Kit for Soil (MP Biomedicals, Santa Ana, CA), following the manufacturer's instructions. Mechanical lysis was performed using a PowerLyzer 24 high-speed homogenizer (Qiagen, Hilden, Germany). Real-time PCR targeted a 77-base pair fragment of the internal transcribed spacer 2 (ITS2) region, amplified using *Schistosoma*-specific primers Ssp48F (Sch\_ITS\_48\_Fwd) and Ssp124R (Sch\_ITS\_124\_Rev), with detection via the dual-labelled probe Ssp78T (Sch\_Probe) (Supplementary Table 2). Each 7  $\mu\text{L}$  reaction consisted of 2  $\mu\text{L}$  DNA template, 3.5  $\mu\text{L}$  TaqPath ProAmp Master Mix (ThermoFisher Scientific, Waltham, MA), with primers and probe added at final concentrations of 0.25  $\mu\text{M}$  and 0.12  $\mu\text{M}$ , respectively. Thermal cycling was carried out on a QuantStudio 7 Flex Real-Time PCR System (Applied Biosystems, Carlsbad, CA) with the following conditions: 50°C for 2 minutes, 95°C for 10 minutes, followed by 40 cycles of 95°C for 15 seconds and 59°C for 1 minute. A microscopy-confirmed *Schistosoma haematobium* (*S. haematobium*)-positive urine sample served as the positive control and was processed alongside test samples during extraction and included in each PCR run. Note that *Schistosoma spp.* infections detected in urine are most likely due to *S. haematobium*. However, the PCR assay used detects *Schistosoma* at the genus level and is not species-specific. A

For stool samples:

Stool samples were tested for infections by *Schistosoma spp.* and the following STHs: *Ascaris lumbricoides* (*A. lumbricoides*, roundworm), *Ancylostoma duodenale* (*A. duodenale*, hookworm), *Necator americanus* (*N. americanus*, hookworm), and *Trichuris trichiura* (*T. trichiura*, whipworm). Genomic DNA was extracted from approximately 0.25 g of stool using the FastDNA™ Spin Kit for Soil (MP Biomedicals, Santa Ana, CA) and a high-speed homogenizer (PowerLyzer 24, Qiagen, Hilden, Germany), following the manufacturer's protocol. PCR amplification was conducted as described above for urine samples, utilising the same *Schistosoma*-specific primers and probes (Supplementary Table 2). Primer and probe sets for soil-transmitted helminths were adopted from Pilotte, et al [5]. Note that *Schistosoma spp.* infections detected in stool are most likely due to *Schistosoma mansoni* (*S. mansoni*). Again, the PCR assay used detects *Schistosoma* at the genus level and is not species-specific.

A cycle threshold (Ct) cutoff of 40 was used to define qPCR positivity.

## Statistical analyses

Descriptive statistics were calculated to characterise the study participants. Continuous variables were summarised using medians and interquartile ranges (IQRs), as the distributions deviated from normality. The distribution of these variables was assessed visually through histograms and boxplots. Comparisons of continuous variables between independent groups were conducted using the Wilcoxon (rank-sum) test, a non-parametric test appropriate for data that are not normally distributed. Categorical variables were presented as counts and corresponding percentages. Group comparisons for categorical variables were performed using either the Pearson chi-squared test or Fisher's exact test, depending on the expected frequencies within contingency tables. Specifically, the chi-squared test was employed when all expected cell counts were  $\geq 5$ , while Fisher's exact test was used when any expected cell count was  $< 5$ , to ensure statistical validity.

To estimate the effect size of overall helminth infected/uninfected comparisons, Cliff's Delta was calculated. To assess the power of the Wilcoxon test for detecting differences in titres between groups, a bootstrap simulation approach was used. Specifically, 1,000 bootstrap samples were generated by resampling with replacement within each helminth status group, preserving group sizes. For each bootstrap sample, the Wilcoxon rank-sum test was performed, and the proportion of tests with a p-value  $< 0.05$  was calculated to estimate the statistical power.

A linear model was used to visualise the comparison between helminth PCR Ct values and SARS-CoV-2 nAb titres, with the relationship quantified using Spearman's correlation coefficient (as titres are not normally distributed).

## Generalised additive model (GAM)

The relationship between SARS-CoV-2 nAb responses and several predictor variables were assessed. A GAM was chosen following initial analysis using a linear regression model displayed poor predictive power and indicated the presence of non-linear relationships. In the GAM (performed using the package `mgcv` version 1.9-1 [6] in RStudio), titres were  $\log_3(\text{Titre}/50)$  transformed as the serial dilution for the titrations were performed in 3-fold steps, starting at a 1 in 50 dilution. We generated two models, the first looking at all SARS-CoV-2 nAb positives (vaccinated and infected). The second looked at those vaccinated to allow the inclusion of the variables "time since last vaccination" and "vaccine type".

The GAM including all SARS-CoV-2 nAb positives (vaccinated and infected) examined the influence of following variables that we hypothesise may influence SARS-CoV-2 neutralisation. We ensured that the variables did not correlate with each other using Spearman's rank correlation coefficient to avoid collinearity in the model.

- Biological sex - categorical
- Number of comorbidities - categorical
- Age - continuous
- Helminth status and COVID-19 vaccination status – categorical, combined

- Variant titred against - categorical

The combined term (helminth status and COVID-19 vaccination status) was included to assess the effect of these terms simultaneously, using the interaction symbol ':' when generating the model.

Before fitting the model, Spearman's rank correlation coefficient was used to check for collinearity among predictor variables, ensuring that highly correlated variables were not included together, which could undermine the model's validity. An initial model including all candidate predictors was then fitted. Model selection was conducted using backward elimination, removing terms that were not statistically significant in a stepwise manner. This approach helped simplify the model and reduce the risk of overfitting, which was particularly important given the relatively small sample size. Due to sample size constraints, the final optimized model was limited to the two most significant and relevant predictors, ensuring sufficient counts within each subgroup [7].

Model assumptions and fit were assessed using standard GAM diagnostic plots. Quantile–quantile (QQ) plots of deviance residuals were examined to determine whether the residuals followed the expected error distribution. Residuals were also plotted against the linear predictor, and histograms of residuals were inspected to identify any systematic patterns or violations of model assumptions, such as non-linearity, heteroscedasticity, or outliers. Additionally, observed versus fitted values plots were used to evaluate how well the model predictions matched the actual data. The effective degrees of freedom for each smooth term particularly for age, were checked to prevent overfitting, and visual inspection of the smooth functions ensured that the modelled relationships were biologically reasonable.

For the GAM including those COVID-19 vaccinated (either "vaccinated only" or "vaccinated and infected"), the following variables were considered:

- Biological sex - categorical
- Number of comorbidities - categorical
- Age - continuous
- Variant titred against - categorical
- Helminth status - categorical
- Vaccine type - categorical
- Time since last vaccination - continuous

For this, smoothing functions were present on the variables age and time since last vaccination. As above, the non-significant variables were removed and only the two most significant variables were chosen to avoid model overfitting.

Categorical predictor variables were modelled as fixed effects, with coefficients estimated relative to a reference category. The output included coefficient estimates – using the  $\log_3(\text{titre}/50)$  scale, standard errors, t-values, and p-values. For ease of interpretation, 95% confidence intervals for the coefficient estimates were calculated using:

Lower bound=Coefficient estimate  $-1.96 \times SE$

Upper bound=Coefficient estimate  $+1.96 \times SE$

Additionally, the percentage change in nAb titre was calculated using:

$$\% \text{ change} = (3^{\text{Coefficient estimate}} - 1) \times 100,$$

with the 95% CI calculated as follows:

$$\text{Lower \% change} = (3^{\text{Coefficient estimate} - 1.96 \times SE} - 1) \times 100$$

$$\text{Upper \% change} = (3^{\text{Coefficient estimate} + 1.96 \times SE} - 1) \times 100$$

These values indicate the direction and magnitude of the effect for each category compared to the reference.

Continuous predictor variables were modelled using splines to fit non-linear, smooth relationships between the predictor and nAb titres. The output of this was the estimated degrees of freedom, degrees of freedom, F-statistic and p-value (F-test). For ease of interpretation, chi-squared ( $\chi^2$ ) was calculated using:

$$\chi^2 = F \times \text{estimated degrees of freedom}$$

to give a measure of how strongly the smooth term contributed to the model. If  $\chi^2$  was notably higher than the estimated degrees of freedom, it generally indicated a stronger effect of that smooth term in the model. Additionally, the smooth term was plotted.

Categorical predictor variables (factorial) were modelled as fixed effects. The output for these terms consisted of the coefficient estimate on the  $\log_3(\text{titre}/50)$  scale (relative to a reference group), standard error (SE), T-statistic and p-value (Wald test).

## Supplementary Tables

**Supplementary Table 1. Spike gene construct mutations, relative to the Wuhan-Hu-1 sequence (GenBank: MN908947).**

| SARS-CoV-2 virus         | Mutations relative to Wuhan-Hu-1 sequence                                                                                                                                                                                                       |
|--------------------------|-------------------------------------------------------------------------------------------------------------------------------------------------------------------------------------------------------------------------------------------------|
| Ancestral (B.1)          | D614G                                                                                                                                                                                                                                           |
| Beta (B.1.351)           | D80A, D215G, L241del, L242del, A243del, K417N, E484K, N501Y, D614G, A701V                                                                                                                                                                       |
| Delta (B.1.617.2)        | T19R, G142D, Δ156-157, R158G, L452R, T478K, D614G, P681R, D950N                                                                                                                                                                                 |
| Omicron BA.1 (B.1.1.529) | A67V, Δ69–70, T95I, G142D/Δ143–145, Δ211/L212I, ins214EPE, G339D, S371L, S373P, S375F, K417N, N440K, G446S, S477N, T478K, E484A, Q493R, G496S, Q498R, N501Y, Y505H, T547K, D614G, H655Y, N679K, P681H, N764K, D796Y, N856K, Q954H, N969K, L981F |
| Omicron BA.2             | T19I, Δ24/26, G142D, V213G, G339D, S371F, S373P, S375F, T376A, D405N, R408S, K417N, N440K, S477N, T478K, E484A, Q493R, Q498R, N501Y, Y505H, D614G, H655Y, N679K, P681H, N764K, D796Y, Q954H, N969K                                              |

**Supplementary Table 2. Primers and probes for *Schistosoma* spp. helminth PCR.**

|                         | Primer name     | Sequence 5'-3'                          |
|-------------------------|-----------------|-----------------------------------------|
| <b>Schistosoma spp.</b> | Sch_ITS_48_Fwd  | GGTCTAGATGACTTGATYGAGATGCT              |
|                         | Sch_ITS_124_Rev | TCCCGAGCGYGTATAATGTCATTA                |
|                         | Sch_Probe       | FAM-<br>TGGGTTGTGCTCGAGTCGTGGC-<br>BHQ1 |

**Supplementary Table 3. Participant Characteristics.**

|                                                         | Karonga (rural)<br>(n=242) | Lilongwe (urban)<br>(n=129) | P-value |
|---------------------------------------------------------|----------------------------|-----------------------------|---------|
| <b>Median age (IQR), years</b>                          | 36.1 (16.0-50.0)           | 38.2 (28.3-49.2)            | 0.49    |
| <b>Age category, years - n (%)</b>                      | ..                         | ..                          | 0.97    |
| 18-39                                                   | 139 (57.4)                 | 73 (56.6)                   | ..      |
| 40-59                                                   | 75 (31.0)                  | 41 (31.8)                   | ..      |
| ≥60                                                     | 28 (11.6)                  | 15 (11.6)                   | ..      |
| <b>Sex - n (%)</b>                                      | ..                         | ..                          | 0.002   |
| Female                                                  | 129 (53.3)                 | 91 (70.5)                   | ..      |
| Male                                                    | 113 (46.7)                 | 38 (29.5)                   | ..      |
| <b>Received ≥1 COVID-19 vaccinations (n, %)</b>         | 77 (31.8)                  | 45 (34.9)                   | 0.63    |
| <b>Treatment for schistosomiasis (n, %)</b>             | ..                         | ..                          | <0.0001 |
| Never                                                   | 131 (54.1)                 | 96 (74.4)                   | ..      |
| Once                                                    | 37 (15.3)                  | 5 (3.9)                     | ..      |
| Twice                                                   | 17 (7.0)                   | 2 (1.6)                     | ..      |
| ≥3 times                                                | 52 (21.5)                  | 18 (13.9)                   | ..      |
| Unknown                                                 | 5 (2.1)                    | 8 (6.2)                     | ..      |
| <b>Number reporting symptoms in past 2 weeks (n, %)</b> | ..                         | ..                          | ..      |
| Blood in urine                                          | 18 (7.4)                   | 10 (7.8)                    | 1.00    |
| Pain when passing urine                                 | 34 (14.0)                  | 12 (9.3)                    | 0.25    |
| Blood in stool                                          | 14 (5.8)                   | 9 (7.0)                     | 0.82    |

IQR = interquartile range, COVID-19 = coronavirus disease 2019.

**Supplementary Table 4. Cross tabulation of *Schistosoma* spp. infection with prevalence of contact with water.**

|                                           | Daily       | 4-6 times per week | 1-3 times per week | Once a month | Once a year | No contact with a water body |
|-------------------------------------------|-------------|--------------------|--------------------|--------------|-------------|------------------------------|
| <b><i>Schistosoma</i> spp. uninfected</b> | 151 (44.3%) | 8 (2.3%)           | 37 (10.9%)         | 5 (1.5%)     | 1 (0.3%)    | 139 (40.8%)                  |
| <b><i>Schistosoma</i> spp. infected</b>   | 13 (43.3%)  | 1 (3.3%)           | 4 (13.3%)          | 0 (0.0%)     | 1 (3.3%)    | 11 (36.7%)                   |

Shown as n participants with % per *Schistosoma* spp. status.

**Supplementary Table 5. Relationship between nAb titre, helminth status, and vaccination status – all SARS-CoV-2 nAb positives.** A GAM was used to model the relationships between predictors and nAb titres. Coefficient estimate shows the extent to which the variable influences nAb titre (on the  $\log_3(x/50)$  scale) with a positive value for an increase, negative value for a decrease. 95% confidence interval (CI) shows the variability in this measure. Percent (%) change represents the change in titre associated with the specific condition. P-value shows the statistical significance and interpretation summarises the output. 203 participants included. Baseline reference categories – COVID-19 unvaccinated, helminth uninfected.

| Variable                                                         | Coefficient estimate (95% CI) | % change (95% CI)   | P-value | Interpretation                                                                                                                                 |
|------------------------------------------------------------------|-------------------------------|---------------------|---------|------------------------------------------------------------------------------------------------------------------------------------------------|
| <b>Intercept</b>                                                 | 0.63 (0.57 to 0.68)           | NA                  | NA      | Baseline level of the outcome (nAb titre) when all predictors are at their reference category – COVID-19 unvaccinated and helminth uninfected. |
| <b>Helminth status: infected:COVID-19 vaccination:vaccinated</b> | -0.53 (-0.80 to -0.25)        | -41% (-55% to -22%) | 0.00024 | Individuals vaccinated and helminth infected have lower titres than non-infected vaccinated individuals                                        |

CI = confidence interval; COVID-19 = coronavirus disease 2019; nAb = neutralising antibody; NA = not applicable.

**Supplementary Table 6. Relationship between nAb titre and age (by vaccine status) – all SARS-CoV-2 nAb positives.** Estimated degrees of freedom indicates the flexibility of the smooth function (1 is a linear relationship, higher values represent increasing non-linearity). Reference degrees of freedom are the number of degrees of freedom set for testing.  $\chi^2$  tests whether the smooth term explains variation in neutralisation levels (higher values for stronger effects). P-value shows the statistical significance and interpretation summarises the output (F-test). 203 participants included. Note for this model a k of 6 was used to avoid overfitting.

| Smooth term | Estimated degrees of freedom | Reference degrees of freedom | $\chi^2$ | P-value | Interpretation                                                         |
|-------------|------------------------------|------------------------------|----------|---------|------------------------------------------------------------------------|
| <b>Age</b>  | 1                            | 1.001                        | 30.3     | <0.0001 | Linear relationship between age and nAb titre among those unvaccinated |

$\chi^2$  = chi-squared.

**Supplementary Table 7. Relationship between nAb titre and titre variant, and helminth status – vaccinated individuals.** A GAM was used to model the relationships between predictors and nAb titres. Coefficient estimate shows the extent to which the variable influences nAb titre (on the  $\log_3(\text{Titre}/50)$  scale) with a positive value for an increase, negative value for a decrease. 95% confidence interval (CI) shows the variability in this measure. Percent (%) change represents the change in titre associated with the specific condition. P-value shows the statistical significance and interpretation summarises the output. Baseline reference category – helminth uninfected. 94 participants included.

| Variable                         | Coefficient estimate (95% CI) | % change (95% CI)   | P-value | Interpretation                                                                                |
|----------------------------------|-------------------------------|---------------------|---------|-----------------------------------------------------------------------------------------------|
| <b>Intercept</b>                 | 0.72 (0.66 to 0.77)           | NA                  | NA      | Baseline level of the outcome (nAb titre) when all predictors are at their reference category |
| <b>Helminth status: Infected</b> | -0.34 (-0.55 to -0.13)        | -29% (-41% to -16%) | 0.0018  | Helminth infected individuals have lower titres than those helminth uninfected                |

CI = confidence interval; nAb = neutralising antibody; NA = not applicable..

**Supplementary Table 8. Relationship between nAb titre vs age and titre vs time since COVID-19 vaccination– vaccinated individuals.** Estimated degrees of freedom indicates the flexibility of the smooth function (1 is a linear relationship, higher values represent increasing non-linearity). Reference degrees of freedom are the number of degrees of freedom set for testing.  $\chi^2$  tests whether the smooth term explains variation in neutralisation levels (higher values for stronger effects). P-value shows the statistical significance and interpretation summarises the output (F-test). 94 participants included

| Smooth term                            | Estimated degrees of freedom | Reference degrees of freedom | $\chi^2$ | P-value | Interpretation                                                           |
|----------------------------------------|------------------------------|------------------------------|----------|---------|--------------------------------------------------------------------------|
| <b>Time since COVID-19 vaccination</b> | 6.72                         | 7.83                         | 46.8     | <0.0001 | Non-linear relationship between age and nAb titre among those vaccinated |

$\chi^2$  = chi-squared; COVID-19 = coronavirus disease 2019.

## Supplementary Figures

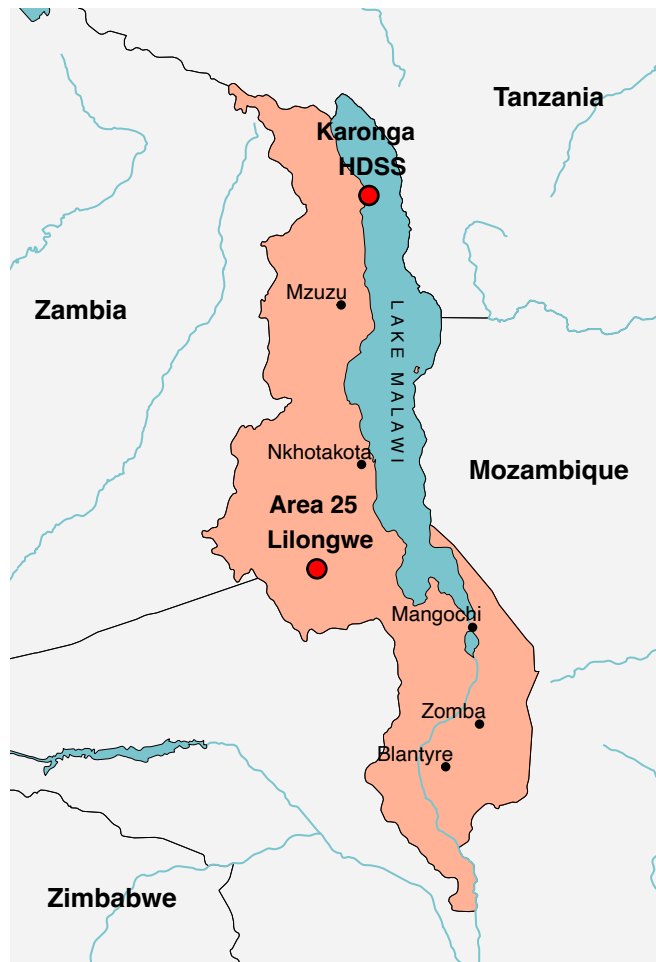

**Supplementary Figure 1. Map of Malawi, showing the location of the Karonga Health Demographic Surveillance Site and Area 25, Lilongwe. Red dots are the study locations.**

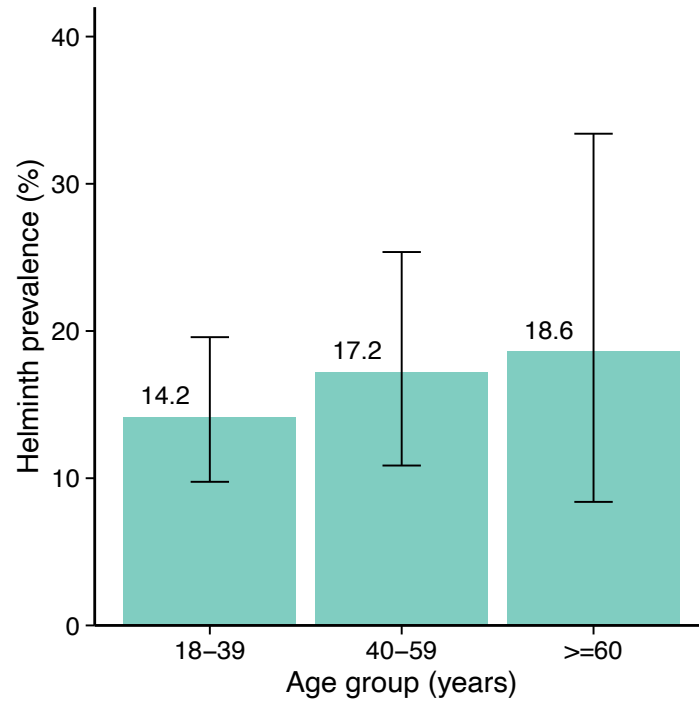

**Supplementary Figure 2. Helminth prevalence (%) by age group (years) of the participants. Helminth prevalence includes individuals tested positive for 'any helminth infection'.** Bar charts display the percentage of participants in each condition (% labelled as text), with error bars displaying the 95% confidence interval for the prevalence.

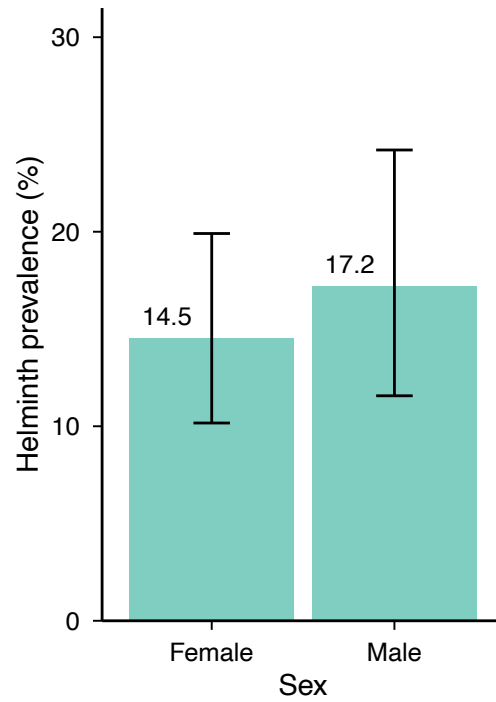

**Supplementary Figure 3. Helminth prevalence (%) by biological sex of the participants. Helminth prevalence includes individuals tested positive for 'any helminth infection'.** Bar charts display the percentage of participants in each condition (% labelled as text), with error bars displaying the 95% confidence interval for the prevalence.

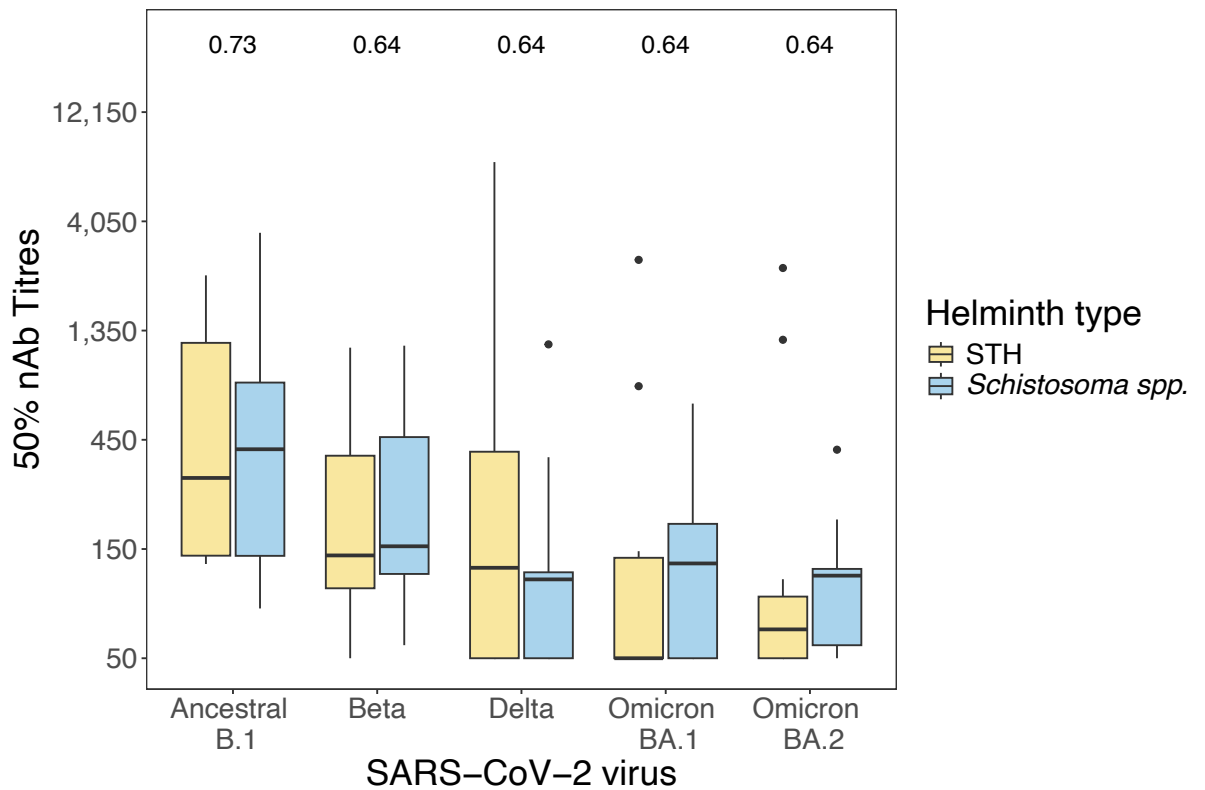

**Supplementary Figure 4: Neutralisation of different SARS-CoV-2 viruses in helminth infected individuals, stratified by helminth type - soil transmitted helminth (STH) (*A. duodenale* and *N. americanus*) vs *Schistosoma* spp. (in stool and urine). 22 participants included – n=13 with STH infection; n=9 with *Schistosoma* infection. Titres were measured using HIV(SARS-CoV-2) pseudotyped virus neutralisation assay. Box plots display the median and interquartile range (IQR) of the outcome (50% titre). Statistical test used was Wilcoxon rank sum test with a false discovery rate correction applied: p-values are presented.**

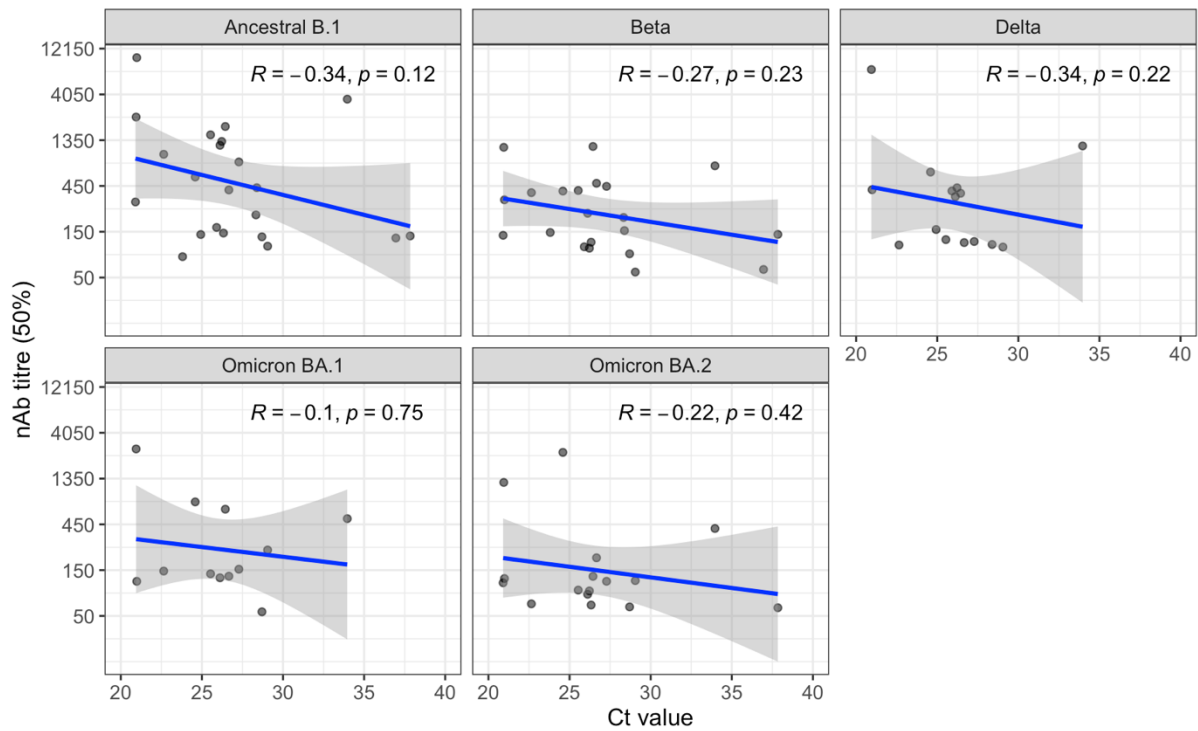

**Supplementary Figure 5. Relationship between helminth burden (inferred by PCR cycle threshold (Ct) values) and SARS-CoV-2 neutralising antibody (nAb) titre using 50% threshold.** Stratified by SARS-CoV-2 variant. Line of best fit (blue) was generated with a linear model, with the 95% confidence interval for this line shown (grey). The relationship was quantified using Spearman’s correlation coefficient – R value and p value presented on the graph.

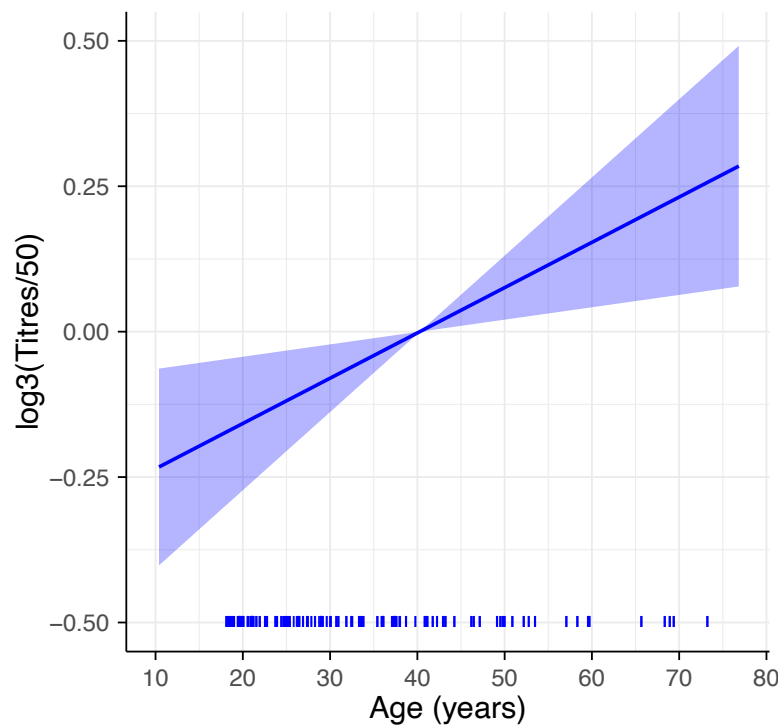

**Supplementary Figure 6: Relationship between age(years) and nAb titre - all SARS-CoV-2 nAb positives.** The linear relationship between age(years) and nAb titre, determined using a GAM. The solid line represents the estimated smooth function, while the shaded region indicates the 95% confidence intervals for this estimate. The x-axis represents the predictor variable (age) while the y-axis represents the response (neutralising titres -  $\log_3(\text{Titres}/50)$ ). The rug marks represent the distribution of participants by age in both the unvaccinated and vaccinated groups. 203 participants included.

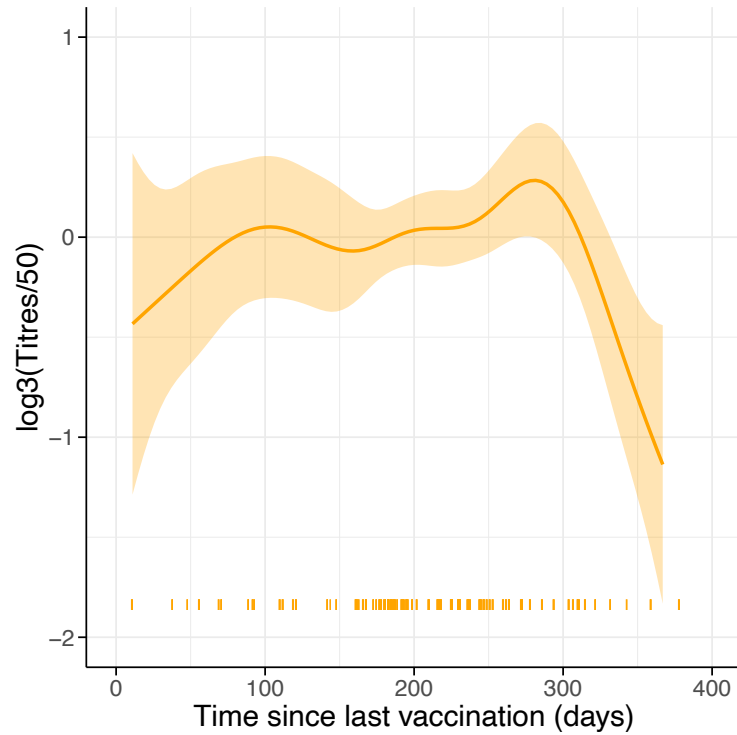

**Supplementary Figure 7: Relationship between nAb titre time since last vaccination (days) – vaccinated individuals.** The non-linear relationship between time since last vaccination (days) and nAb titre, determined using a GAM. The solid line represents the estimated smooth function, while the shaded region indicates the 95% confidence intervals for this estimate. The x-axis represents the predictor variable while the y-axis represents the response (neutralising titres -  $\log_3(\text{Titres}/50)$ ). The rug marks represent the distribution of participants within the predictor variable. 94 participants included.

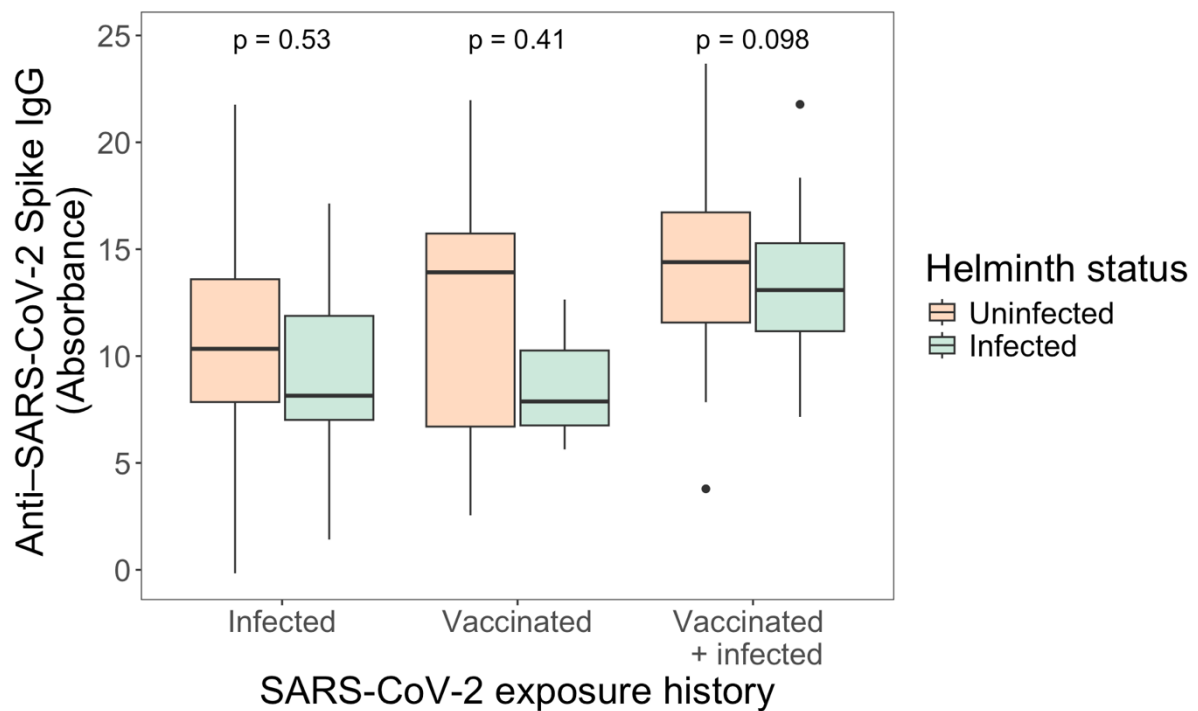

**Supplementary Figure 8: Anti-SARS-CoV-2 Spike IgG (Absorbance) by helminth status, among those Spike (S) ELISA positive, separated by SARS-CoV-2 exposure history.** Anti-SARS-CoV-2 S IgG measured with an enzyme linked immunosorbent assay (ELISA) using the ancestral B.1 S protein. Among those SARS-CoV-2 infected, 112 participants were helminth uninfected and 23 were helminth infected. Among those COVID-19 vaccinated, 19 participants were helminth uninfected and 3 were helminth infected. Among those SARS-CoV-2 infected and COVID-19 vaccinated, 73 participants were helminth uninfected and 8 were helminth infected. Boxplots show median and IQR of 50% titres. The whiskers stretch to the farthest data points that lie within  $1.5 \times$  IQR of Q1 and Q3, while any points beyond this range are displayed as outliers. Wilcoxon (rank-sum) test with false discovery rate correction was used; p-values shown. Due to very small subgroup sizes, statistical comparisons should be interpreted with caution and are presented as exploratory analyses.

## References

- 1 Zufferey, R., Nagy, D., Mandel, R. J., Naldini, L. & Trono, D. Multiply attenuated lentiviral vector achieves efficient gene delivery in vivo. *Nat. Biotechnol.* **15**, 871-875; 10.1038/nbt0997-871 (1997).
- 2 Zufferey, R. et al. Self-inactivating lentivirus vector for safe and efficient in vivo gene delivery. *J. Virol.* **72**, 9873-9880; 10.1128/jvi.72.12.9873-9880.1998 (1998).
- 3 Banda, L. et al. Characterizing the evolving SARS-CoV-2 seroprevalence in urban and rural Malawi between February 2021 and April 2022: A population-based cohort study. *Int. J. Infect. Dis.* **137**, 118-125; 10.1016/j.ijid.2023.10.020 (2023).
- 4 Hughes, E. C. et al. Severe acute respiratory syndrome coronavirus 2 serosurveillance in a patient population reveals differences in virus exposure and antibody-mediated immunity according to host demography and healthcare setting. *J. Infect. Dis.* **223**, 971-980; 10.1093/infdis/jiaa788 (2021).
- 5 Pilotte, N. et al. Improved PCR-based detection of soil transmitted helminth infections using a next-generation sequencing approach to assay design. *PLOS Negl. Trop. Dis.* **10**, e0004578; 10.1371/journal.pntd.0004578 (2016).
- 6 Wood, S. N. Fast stable restricted maximum likelihood and marginal likelihood estimation of semiparametric generalized linear models. *J. R. Stat. Soc. Ser. A Stat. Soc.* **73**, 3-36 (2011).
- 7 Ogundimu, E. O., Altman, D. G. & Collins, G. S. Adequate sample size for developing prediction models is not simply related to events per variable. *J. Clin. Epidemiol.* **76**, 175-182; 10.1016/j.jclinepi.2016.02.031 (2016).
